# Supplementary material for: Stable isotope and fatty acid analyses reveal significant differences in trophic niches of smooth hammerhead Sphyrna zygaena (Carcharhiniformes) among three nursery areas in northern Humboldt Current System
Source: PeerJ. 2021 Apr 22;9:e11283. doi: 10.7717/peerj.11283 (PMC8071072; doi:10.7717/peerj.11283)
Supplement: Supplemental Information 6 [file peerj-09-11283-s006.xlsx]

## Sheet: Data_Hammerhead
N	Site	Muscle (MUS)	Liver (LIV)	Individual	Total_Length	Sex	MUS_d13CVPDB_‰	MUS_d15NAir_‰	MUS_d15NAir_‰_CORRECTED	C:N	LIV_d13CVPDB_‰	LIV_d15NAir_‰	LIV_d15NAir_‰_CORRECTED	C:N	Mus_mg-gDW_C11:0	Mus_mg-gDW_C14:0	Mus_mg-gDW_C16:0	Mus_mg-gDW_C16:1	Mus_mg-gDW_C18:0	Mus_mg-gDW_C18:1n9	Mus_mg-gDW_C20:5n3	Mus_mg-gDW_C22:0	Mus_mg-gDW_C22:6n3	Liv_mg-gDW_C11:0	Liv_mg-gDW_C12:0	Liv_mg-gDW_C13:0	Liv_mg-gDW_C14:0	Liv_mg-gDW_C14:1	Liv_mg-gDW_C15:0	Liv_mg-gDW_C16:0	Liv_mg-gDW_C16:1	Liv_mg-gDW_C17:0	Liv_mg-gDW_C17:1	Liv_mg-gDW_C18:0	Liv_mg-gDW_C18:1n9	Liv_mg-gDW_C18:2n6c	Liv_mg-gDW_C18:2n6t	Liv_mg-gDW_C18:3n6	Liv_mg-gDW_C18:3n3	Liv_mg-gDW_C20:0	Liv_mg-gDW_C20:1	Liv_mg-gDW_C20:2	Liv_mg-gDW_C20:3n6	Liv_mg-gDW_C20:3n3	Liv_mg-gDW_C20:5n3	Liv_mg-gDW_C22:0	Liv_mg-gDW_C22:1n9	Liv_mg-gDW_C23:0	Liv_mg-gDW_C22:6n3
1	Máncora	SXMM3	S1HM20	100(A)	112		-16.1903	14.1389	15.9757	3.20972	-20.9427	12.0856	13.9552	7.35668	0	0	1.23175	0	0.806	0	0	0	0	0	0	0	7.63675	0	2.24275	73.3175	9.37325	4.29025	0	26.1547	31.0202	0	2.0875	0	0	0	0	0	0	0	5.714	0	0	0	24.4108
2	Máncora	SXMM4	S2HM2	81(A)	117		-16.1543	14.5921	16.4216	3.15605	-18.5691	12.1922	14.0601	4.72217	0	0	1.67675	0	0.93275	0	0	0	0	0	0	0	3.404	0	1.4665	58.5225	3.709	2.1495	0	22.3405	15.524	0	1.058	0	1.034	0	3.077	0	0	1.6705	3.441	0	0	3.582	8.611
3	Máncora	SXMM5	S2HM4	83(A)	115		-16.6188	13.4505	15.2982	3.18919	-17.6083	11.1517	13.0362	3.68169	0	0	1.379	0	0.92575	0	0	0	0	0	0	0	5.04975	0	1.38	58.536	8.35925	2.75325	0.9695	22.583	23.3538	0	0	0	0.6315	0.69675	3.5985	0	0	0	0	0	1.1825	0	2.5875
4	Máncora	SXMM7	S2HM5	84(A)	110		-16.2098	13.3702	15.2193	3.14264	-18.7911	11.8469	13.7204	4.79605	0	0	1.59775	0	0.83325	0	0	0	0	0	0	0	9.90275	0	2.255	96.0148	11.1862	4.748	0	27.667	59.3153	0	0	0	1.01125	0	7.5265	0	0	0	0	0	0	0	0
5	Máncora	SXMM8	S2HM6	85(A)	105		-16.2074	13.2955	15.1458	3.17691	-18.6433	11.8176	13.6915	4.56495	0	0	1.31225	0	0	0	0	0	0	0	0	0	6.47725	0	2.09375	88.9395	17.6637	4.1135	0	24.4208	51.0712	0	0	0	0	0	0	0	0	0	0	0	0	0	4.5925
6	Máncora	SXMM2	S2HM8	87(A)	122		-16.3169	14.4385	16.2705	3.17447	-18.7988	11.9431	13.815	5.0898	0	0	0.9805	0	0	0	0	0	0	0	0	0	8.84275	0	2.38275	117.666	22.743	4.9635	3.56275	26.4235	58.3862	0	6.2965	2.5405	5.017	1.2565	10.5025	2.58	0	10.1345	57.5025	0	0	5.41325	45.1082
7	Máncora	S1MX10	S1HM10	91(A)	122		-15.9716	13.5668	15.4127	3.15397	-18.9943	11.9391	13.8111	5.06834	0	0	1.34825	0	0.819	0	0	0	0	0	0.73175	0	9.8085	0	2.15025	95.9385	22.0763	4.03475	0	20.101	52.8072	0	1.31225	0	0	0	5.0065	0	0	0	0	0	0	0	7.887
8	Máncora	S1MX11	S1HM11	92(A)	115		-16.3976	13.8104	15.6524	3.20268	-17.5879	11.5571	13.4352	3.83041	0	0	1.04	0	0	0	0	0	0	0	0	0	8.808	0	2.25075	86.807	23.8535	4.42025	0	23.2525	50.7557	0	4.03675	0	3.3605	0	0	0	0	0	35.4555	0	0	0	0
9	Máncora	S1MX14	S1HM14	95(A)	112		-15.74	13.5031	15.35	3.08755	-17.6106	11.4996	13.3786	4.00582	0	0	1.464	0	0.83275	0	0	0	0	0	0	0	8.4815	0	0.33875	108.132	27.5822	4.69175	0	25.6488	48.8548	0	0	0	0	0	15.0633	0	0	8.599	39.31	0	0	0	27.5388
10	Máncora	S1MX15	S1HM15	96(A)	122		-14.4149	13.2828	15.1333	2.9005	-18.1519	12.8273	14.685	4.79341	0	0	1.45575	0	0.845	0	0	0	0	0	0	0	10.2105	0	2.07675	73.572	17.0365	3.6435	0	21.3345	26.9985	0	0	0	0	0	4.35475	0	0	0	0	0	0	0	0
11	Máncora		S2HM1		111						-21.1974	11.8436	13.7171	9.66695										0.6235	0	0.579	5.272	0	2.1655	59.421	5	4.481	1.674	24.274	27.2935	0	0.879	0	1.144	1.1725	7.6415	0	0	0	0	0	2.228	0	0
12	Máncora		S1HM3		111						-19.7827	11.5252	13.4038	4.90913										0	0	0	7.4515	0	2.2695	86.8448	11.1572	4.82	0	23.1085	45.3125	0	0	0	0	0	0	0	0	0	0	0	0	0	0
13	Máncora		S1HM5		113						-16.7061	13.031	14.8855	3.68218										0	0	0	9.618	1.66025	1.68225	66.2007	50.361	4.3535	0	23.349	89.5353	0	0	0	0	0	12.7628	0	0	0	5.7765	0	0	0	23.2153
1	San José	S2MM42	S2HM12	112(B)	70	M	-15.1247	13.9454	15.7852	3.07661	-17.8675	12.466	14.3296	4.71933	0	0	2.066	0	1.1165	0	0	0	0	0	0	0	6.00125	0.84375	2.0435	94.3715	45.5785	4.523	0	28.9595	59.6345	0	0	0	0	0	4.04275	0	0	0	0	0	0	0	22.1125
2	San José	S2MM48	S2HM18	118(B)	72.6	M	-15.5283	13.7418	15.5849	3.14415	-16.8144	12.5149	14.3777	4.0687	0	0	2.458	0	1.49325	1.6745	0	0	0	0	0	0	13.3705	0	2.20025	119.321	44.3852	4.494	0	28.393	55.9802	0	4.147	0	3.026	0	0	0	0	6.31325	62.7893	0	0	0	76.4463
3	San José	S2XX5	S2XX6	62(B)	74	M	-15.2073	13.9949	15.834	3.14619	-15.7572	12.5201	14.3828	3.78784	0	0.7165	4.88875	0.73025	2.5975	3.0295	0	0	2.4175	0	0	0	14.7575	0	2.38625	117.57	47.2287	2.3625	0	30.0765	51.8305	0	0	0	3.18125	0	6.13575	0	0	8.1695	70.0148	0	0	0	171.578
4	San José	S2XX7	S2XX8	63(B)	83	F	-14.9749	13.8986	15.7393	3.109	-16.2616	12.9149	14.7712	3.92779	0	0.65775	4.022	0.92225	2.71675	2.708	1.4485	0	7.10675	0	0	0	18.918	0	2.56325	124.261	47.94	5.38475	4.55825	34.2582	60.6283	2.9035	6.04025	3.80575	4.39025	0	7.60425	0	0	10.0077	0	0	0	8.5545	103.31
5	San José	S2XX9	S2XX10	64(B)	77	M	-15.2802	14.3211	16.155	3.16124	-17.1528	12.8078	14.6659	4.62439	0	0	3.12	0	1.8385	1.87525	0	0	0	0.60175	0	0.83325	24.122	0	3.36075	138.487	36.7365	6.19325	0	39.1235	64.504	0	1.04175	0	0	0	6.51775	2.52025	0	0	0	6.67425	0	9.89075	32.0405
6	San José	S2XX11	S2XX12	65(B)	81.7	F	-15.3209	13.8935	15.7342	3.22473	-16.0257	12.5556	14.4178	3.83786	0.5805	0.64675	1.27375	0	2.0765	1.50925	0	0	0	0	0	0	12.4927	0	1.74875	73.229	20.089	4.72175	2.142	24.5515	24.9215	0	2.5845	1.797	1.80225	0	3.68975	0	0	3.403	28.6528	0	0	0	61.901
7	San José	S2XX13	S2XX14	66(B)	89.2	M	-15.535	14.2157	16.0512	3.21171	-16.6912	12.6469	14.5076	4.09172	0	0	3.41075	0	2.868	2.8185	0	0	1.888	0	0.70575	0	15.3665	0	2.08825	86.1172	23.747	4.03	2.6085	24.7608	35.3428	0	3.3885	1.75775	1.653	1.118	4.97425	0	0	2.496	16.101	0	0	0	28.2567
8	San José	S2XX17	S2XX18	68(B)	88	M	-15.5908	14.0776	15.9154	3.2317					0	0	2.95225	0	1.8955	0	0	0	0	0	0	0	8.9205	0	2.48175	38.5785	4.85625	3.61325	0	17.5545	11.6103	0	0	0	0	0	0	0	0	0	0	0	0	0	32.3275
9	San José	S2XX23	S2XX24	71(B)	82.9	F	-16.0301	13.5381	15.3845	3.15505	-16.5673	11.9788	13.8501	3.83252	0	0	1.663	0	1.3905	1.24075	0	0	2.73625	0	0	0	8.535	0	1.7115	75.4453	18.6865	3.3605	2.19925	23.3622	40.4693	1.82575	3.04925	1.628	2.10375	0	4.36625	0	0	5.49225	31.791	0	0	5.842	55.578
10	San José	S2XX27	S2XX28	73(B)	73	F	-15.5142	14.111	15.9483	3.15583	-16.7901	12.588	14.4496	3.98273	0	0	2.4795	0	1.52025	1.8285	0	0	0	0	0	0	17.2213	0	2.23	92.4455	32.1422	4.4095	0	30.2027	41.0213	0	4.59525	0	0	0	0	0	0	0	63.435	0	0	0	58.8477
11	San José	S2XX31	S2XX3	75(B)	82.2	M	-15.9742	15.209	17.0287	3.18609	-17.0434	13.2443	15.0954	3.93224	0	0	2.03975	0	1.2575	0	0	0	0	0	0	0	6.889	0	2.66175	71.6197	13.3652	4.9705	0	36.2037	40.6217	0	3.83775	1.5315	2.30075	1.28025	7.60125	1.82275	0.882	5.98925	17.7377	0	0	9.88775	0
12	San José	S2XX32	S2XX33	76(B)	80	F	-17.4078	14.0294	15.8679	3.86076	-17.4125	12.6191	14.4802	4.42871	0	0	1.897	0	1.09075	0	0	0	0	0	0	0	14.634	0	2.28075	103.499	26.235	4.67375	0	28.3307	46.15	0	3.76525	0	0	0	8.10925	0	0	6.20025	45.6602	0	0	0	80.8205
13	San José	S2XX34	S2XX35	77(B)	95	M	-15.7952	14.0979	15.9354	3.10021	-17.6763	12.0308	13.9013	4.35182	0	0	1.47925	0	0.912	0	0	0	0	0	0	0	10.6468	0	2.267	87.9737	16.239	4.24875	0	29.624	41.7945	0	0	0	0	0	0	0	0	0	0	0	0	0	25.1095
14	San José	S2XX15	S2XX16	67(B)	84.2	F	-15.5919	13.7985	15.6408	3.16706	-16.8518	12.147	14.0157	4.27798	0	0	1.948	0	1.482	0	0	0	0	0	0.71175	0	13.3382	0	2.1635	86.9332	19.5128	4.445	0	26.3817	31.5585	0	3.29025	0	0	0	4.64775	0	0	0	8.67475	0	0	0	34.317
15	San José	S2XX19	S2XX20	69(B)	79.7	M	-15.113	14.4549	16.2866	3.12835	-16.6467	13.0735	14.9274	4.11809	0	0	2.6695	0	2.093	0	0	0	2.664	0	0	0	13.5505	0	1.761	66.8053	14.1728	3.13775	0	22.336	22.1023	0	0	0	0	0	0	0	0	0	11.6547	0	0	0	39.934
16	San José	S2MM40	S2HM10	110(B)	74	F	-15.6147	14.1042	15.9415	3.2004	-16.2527	12.8722	14.7292	3.42191	0	0	1.0725	0	0	0	0	0	0	0	0	0	6.504	0	0.60375	58.6455	29.3283	2.39	0	22.8558	36.1878	0	0	0	0	0	0	0	0	0	0	0	0	0	2.5975
17	San José	S2MM45			76	M	-16.0284	14.2278	16.0632	3.16524					0	0	1.9845	0	1.199	1.61675	0	0	1.11
18	San José	S2MM44			79	M	-16.1247	13.8988	15.7394	3.17697					0	0	1.734	0	1.0135	1.335	0	0	0
19	San José	S2XX21			81.8	F	-14.9238	14.4206	16.2529	3.20545					0	0	2.35875	0	1.625	0	0	0	0
20	San José		S2HM13	113(B)	78	F					-18.7146	12.0737	13.9435	4.48538										0	0	0	13.2685	0	3.637	70.8268	18.768	3.50475	0	23.381	35.6745	0	0	0	0	0	0	0	0	0	0	0	0	0	60.8685
1	Salaverry	S3MM6	S3HM6	101(C )	77	M	-14.8761	12.7531	14.6121	2.81898	-17.403	12.8003	14.6585	3.92713	0	0.7005	2.1535	0	0.9995	2.007	0	0	0	0	0	0	16.978	0	2.68625	101.567	33.8783	5.2615	0	28.1637	64.6593	0	0	0	0	0	0	0	0	0	35.288	0	0	0	74.9027
2	Salaverry	S3MM7	S3HM7	102(C )	78	M	-16.2074	14.0038	15.8427	3.16723	-17.4927	12.7414	14.6005	3.86782	0	0	1.80625	0	1.112	1.28675	0	0	0	0	0	0	19.8932	0	3.22825	120.277	30.5275	6.339	0	35.5655	68.6175	0	6.72375	0	0	0	10.6713	0	0	8.217	78.3628	0	0	0	96.2922
3	Salaverry	S3MM8	S3HM8	103(C )	79	F	-16.6351	13.7981	15.6403	3.15798	-18.0275	11.9988	13.8699	3.94232	0	0	1.4625	0	0.84575	0	0	0	0	0	0	0	14.2735	0	2.716	93.6397	20.392	5.488	0	28.2507	68.7357	0	4.45725	0	3.227	0	11.971	0	0	6.27975	40.0042	0	0	0	131.815
4	Salaverry	S3MM9	S3HM9	104(C )	80	M	-16.7107	13.7838	15.6262	3.20814	-19.7837	12.0376	13.908	5.14132	0	0	1.85175	0	0.9675	0	0	0	0	0	0	0	17.8035	0	3.095	104.359	27.137	6.7045	0	33.6075	53.0057	0	6.09175	0	0	0	9.678	0	0	0	58.3545	0	0	0	64.699
5	Salaverry	S3MM10	S3HM10	105(C )	83	F	-16.2675	13.8702	15.7113	3.12006	-19.7029	12.6669	14.5272	5.55252	0	0	1.303	2.25375	0	2.4345	0	3.3025	2.546
6	Salaverry	S3MM11	S3HM11	106(C )	79	F	-16.7173	14.1164	15.9536	3.18536	-18.9324	12.6001	14.4615	4.49108	0.6375	0.769	2.31725	0.49725	1.1725	1.5235	0	0	1.34275	0	0	0	15.2435	0	2.7235	45.7625	24.4505	5.355	0	29.115	0	0	4.9835	0	3.60825	0	12.6047	0	0	0	34.4712	0	0	0	2.56
7	Salaverry	S3MM13	S3HM13	108(C )	84	F	-16.4849	14.3678	16.2009	3.18642	-17.6876	12.9477	14.8035	3.8794	0	0	0.95875	0	0	0	0	0	0	0	0	0	8.34675	0	2.3935	69.8563	11.632	4.9415	0	23.1917	33.4332	0	1.365	0	0	0	9.2845	0	0	0	0	0	0	0	57.705
8	Salaverry	S3MM1	S3HM1	52(C )	82	M	-16.7703	13.9571	15.7967	3.1327	-20.2433	12.1834	14.0514	5.56577	0	0.76825	2.747	0.597	1.924	1.6955	0	0	4.032	0	0	0	7.6425	0	2.537	79.9758	11.28	6.41925	0	29.708	30.6415	0	1.908	0	0	0	8.6775	0	0	0	4.25375	0	0	0	18.3968
9	Salaverry	S3MM2	S3HM2	53(C )	85	F	-16.8406	13.9456	15.7855	3.1725	-18.1003	11.6988	13.5746	3.96528	0	0.7035	4.2855	0	3.1235	2.093	0	0	0	0	0	0	7.9145	0	2.4685	83.6222	18.262	5.76375	0	27.526	54.4432	0	4.71525	0	3.4435	0	13.8472	0	0	8.2335	38.016	0	0	0	0
10	Salaverry	S3MM3	S3HM3	54(C )	81	F	-16.5326	14.3246	16.1584	3.16181	-19.6365	12.3027	14.1689	5.11808	0	0	2.5555	0	2.02925	0	0	0	3.435	0	0	0	13.885	0	2.40725	79.739	21.9928	4.67525	0	23.598	45.8002	0	3.3565	0	0	0	0	0	0	0	29.9108	0	0	0	26.5312
11	Salaverry	S3MM5	S3HM5	56(C )	84	M	-16.8295	13.7315	15.5748	3.15411	-19.807	12.152	14.0206	4.88909	0	0.7235	3.43425	0	2.121	0	0	1.30175	4.0765
12	Salaverry	S3MM4	S3HM4	55(C )	83	M	-16.8561	14.1875	16.0235	3.15419	-19.1111	11.9062	13.7787	4.42449	0	0.68425	3.73075	0.62525	2.116	2.63975	0	0	4.37725	0	0	0	11.6105	0	3.30075	120.038	25.1047	7.2335	0	39.9185	69.4985	0	1.0325	0	1.82825	2.0325	10.9682	0	0	0	0	1.34525	2.8485	0	0
13	Salaverry	S3MM12	S3HM12	107(C )	82	F	-16.7241	14.0394	15.8777	3.1379	-18.2257	11.957	13.8287	3.93079	0	0	1.31525	0	0.85825	0	0	0	0
14	Salaverry	S3MM14	S3HM14	109(C )	79	F	-15.3075	14.0125	15.8513	3.09735	-17.3072	12.5062	14.3691	4.26966	0	0	1.22675	0	0	0	0	0	0	0	0	0	21.2377	0	2.603	106.13	34.3218	4.6285	0	26.9622	48.0637	0	4.38825	0	0	0	0	0	0	0	52.449	0	0	0	0
[truncated: 14 more columns]

## Sheet: Data_accomp_fishes
Number	Site	Code	Species_name	Common_name	Abbrev	Total_Length	TL_avr_sp	Lipid_weigth_mg	Total_Lipid_DW	Energy_Jlip	d13CVPDB_‰	d15NAir_‰	mg-gDW_C6:0	C8:0	C10:0	C11:0	C12:0	C13:0	C14:0	C14:1	C15:0	C15:1	C16:0	C16:1	C17:0	C17:1	C18:0	C18:1n9	C18:2n6c	C18:2n6t	C18:3n6	C18:3n3	C20:0	C20:1	C20:2	C20:3n6	C20:3n3	C20:5n3	C22:0	C22:1n9	C22:2	C23:0	C22:6n3	C24:0	C24:1	TAGS	TAGMI	TAGPI3	TAGPI
3	San José	S2MP5X	Engraulis ringens	Peruvian anchovy	Anc	13.5		0.966667	4.83333	191.11	-15.6639	13.2994	0	0	0	0	0	0	0.93225	0	0	0	3.06625	0	0	0	1.31875	0	0	0	0	0	0	0	0	0	0	0	0	0	0	0	0	0	0	5.31725	0	0	0
4	San José	S2MP7X	Engraulis ringens	Peruvian anchovy	Anc	13.4		1.9	9.5	375.63	-15.0955	12.7338	0	0	0	0	0	0	0.70925	0	0	0	1.997	0	0	0	0	0	0	0	0	0	0	0	0	0	0	0	0	0	0	0	0	0	0	2.70625	0	0	0
8	San José	S2MP4X	Engraulis ringens	Peruvian anchovy	Anc	15.3		2.26667	11.3333	448.12	-14.8935	12.2735	0	0	0	0	0	0	3.571	0	0.54575	0	11.1873	0	0	0	3.15775	0	0	0	0	0	0	0	0	0	0	0	0	0	0	0	0	0	0	18.4618	0	0	0
16	Salaverry	S3MP1	Engraulis ringens	Peruvian anchovy	Anc		14	0.933333	4.66667	184.52	-15.8456	14.0225	0	0	0	0	0	0	1.30675	0	0	0	3.374	0	0	0	0	0	0	0	0	0	0	0	0	0	0	0	0	0	0	0	0	0	0	4.68075	0	0	0
25	Salaverry	S3MP13	Engraulis ringens	Peruvian anchovy	Anc		14	3.3	16.5	652.41	-16.1653	11.1961	0	0	0	0	0	0	7.171	0	0.68275	0	15.18	0	0.84475	0	4.56475	3.95225	0	0	0	0	0	0	0	0	0	0	0	0	0	0	0	0	0	28.4433	3.95225	0	0
1	San José	S2MP1	Sarda chiliensis	Striped bonito	Bon		74.5	5.1	25.5	1008.27	-15.7684	15.8691	0	0	0	0	0	0	7.1285	0	1.073	0	35.144	7.29325	1.43025	0	9.79725	23.3002	0	0	0	0	0	0	0	0	0	0	0	0	0	0	1.34775	0	0	54.573	30.5935	1.34775	1.34775
2	San José	S2MP2	Sarda chiliensis	Striped bonito	Bon		74.5	3.56667	17.8333	705.13	-15.7851	14.6421	0	0	0	0	0	0	3.68875	0	0.63475	0	17.9838	2.685	0.887	0	5.27975	9.14	0	0	0	0	0	0	0	0	0.862	4.924	0	0	0	0	11.874	0	0	28.474	11.825	17.66	17.66
29	Máncora	S1MP1	Sarda chiliensis	Striped bonito	Bon		74.5	3.2	16	632.64	-15.6452	16.4709	0	0	0	0	0	0	2.934	0	0.68875	0	20.6805	2.9095	0.84175	0	5.84675	17.5422	0	0.64375	0	0	0	1.7395	0	0	1.1205	4.29525	0	0	0	0	16.3508	0	0.8335	30.9917	23.0247	21.7665	22.4103
13	Salaverry	S3MP2	Cynoscion analis	Peruvian weakfish	Cac		35.3	4.43333	22.1667	876.47	-14.1816	14.8901	0	0	0	0	0	0	5.95975	0	0	0	32.1538	7.3545	0	0	8.16475	14.7958	0	0	0	0	0	0	0	0	0	0	0	0	0	0	0	0	0	46.2782	22.1502	0	0
23	Salaverry	S3MP15	Cynoscion analis	Peruvian weakfish	Cac		35.3	1.4	7	276.78	-15.5605	15.3474	0	0	0	1.07125	0	0	1.73	0	0	0	7.72725	0	0	0	2.30275	0	0	0	0	0	0	0	0	0	0	0	0	0	0	0	0	0	0	12.8312	0	0	0
11	Salaverry	S3MP18	Paralonchurus dumerilii	Suco croaker	Coc		30	0.966667	4.83333	191.11	-14.324	14.0716	0	0	0	0	0	0	1.56925	0	0	0	6.999	1.922	0	0	2.35475	4.43225	0	0	0	0	0	0	0	0	0	1.2365	0	0	0	0	2.14475	0	0	10.923	6.35425	3.38125	3.38125
24	Salaverry	S3MP10	Paralonchurus dumerilii	Suco croaker	Coc		30	1.33333	6.66667	263.6	-13.9169	12.994	0	0	0	0	0	0	2.43325	0	0.60975	0	10.832	0	0.578	0	3.347	0	0	0	0	0	0	0	0	0	0	0	0	0	0	0	0	0	0	17.8	0	0	0
20	Salaverry	S3MP4	Mugil cephalus	Flathead grey mullet	Lis		50	1.9	9.5	375.63	-14.2319	12.7276	0	0	0	0	0	0	4.702	0	0.47325	0	12.2775	0	0	0	2.062	0	0	0	0	0	0	0	0	0	0	0	0	0	0	0	0	0	0	19.5147	0	0	0
28	Salaverry	S3MP9	Mugil cephalus	Flathead grey mullet	Lis		50	1.36667	6.83333	270.19	-14.1177	12.2938	0	0	0	0	0	0	2.7405	0	0	0	9.0435	0	0	0	2.32925	15.1555	0	1.45575	0	9.9365	0	0	0	0	0	0	1.995	0	0	0	2.75475	0	0	16.1083	15.1555	12.6913	14.147
12	Salaverry	S3MP3	Ethmidium maculatum	Pacific menhaden	Mac		25.7	3.43333	17.1667	678.77	-15.0553	12.5682	0	0	0	0	0	0	8.291	0	0.7455	0	26.7102	7.737	0	0	6.59425	8.60425	0	0	0	0	0	0	0	0	0	0	0	0	0	0	0	0	1.479	42.341	17.8203	0	0
26	Salaverry	S3MP7	Ethmidium maculatum	Flathead grey mullet	Mac		25.7	2.26667	11.3333	448.12	-14.1357	12.756	0	0	0	0	0	0	6.7385	0	0.8295	0	24.6502	10.2398	0.96275	12.1028	5.96575	30.7425	0	0	0	0	0	0	0	0	0	0	5.19	0	0	6.73575	4.58	0	1.87125	51.0725	54.9562	4.58	4.58
9	San José	S2MP3X	Merluccius gayi	South Pacific Hake	Mer		50	1	5	197.7	-16.0709	12.1563	0	0	0	0	0	0	2.71025	0	0.64075	0	11.1325	8.74875	0.6865	13.9605	2.81475	25.8735	0	0	0	0	0	0	0	0	0	0	3.78475	0	0	0	4.39675	0	0	21.7695	48.5827	4.39675	4.39675
10	San José	S2MP2X	Merluccius gayi	South Pacific Hake	Mer		50	1.3	6.5	257.01	-16.9721	10.5285	0	0	0	0	0	0	0.8955	0	0	0	2.74525	0	0	0	1.01425	0	0	0	0	0	0	0	0	0	0	0	0	0	0	0	0	0	0	4.655	0	0	0
18	Salaverry	S3MP8	Merluccius gayi	South Pacific Hake	Mer		50	0.533333	2.66667	105.44	-17.1598	12.0986	0	0	0	0	0	0	0	0	0	0	1.47775	0	0	0	0.80575	0	0	0	0	0	0	0	0	0	0	0	0	0	0	0	0	0	0	2.2835	0	0	0
19	Salaverry	S3MP17	Merluccius gayi	South Pacific Hake	Mer		50	0.833333	4.16667	164.75	-17.1734	12.0214	0	0	0	0	0	0	0	0	0	0	1.52825	0	0	0	0.80325	0	0	0	0	0	0	0	0	0	0	0	0	0	0	0	0	0	0	2.3315	0	0	0
31	Máncora	S1MP2	Mobula japanica	Spinetail mobula	Mób		225	0.366667	1.83333	72.49	-16.0157	11.6091	0	0	0	0	0	0	0	0	0	0	2.8985	0	0	0	1.6915	0	0	0	0	0	0	0	0	0	0	0	0	0	0	0	3.219	0	0	4.59	0	3.219	3.219
32	Máncora	S1MP3	Mobula japanica	Spinetail mobula	Mób		225	0.2	1	39.54	-16.6203	11.567																																		0	0	0	0
6	San José	S2MP6X	Stellifer minor	Minor stardrum	Moj	13.4		1.76667	8.83333	349.27	-14.0838	13.6861	0	0	0	0	0	0	1.84275	0	0	0	8.236	2.30125	0	0	2.17125	2.12675	0	0	0	0	0	0	0	0	0	0	0	0	0	0	0	0	0	12.25	4.428	0	0
7	San José	S2MP8X	Stellifer minor	Minor stardrum	Moj	12.7		1.33333	6.66667	263.6	-15.3501	14.0471	0	0	0	0	0	0	1.20175	0	0	0	4.3135	0	0	0	1.34175	1.6975	0	0	0	0	0	0	0	0	0	0	0	0	0	0	0	0	0	6.857	1.6975	0	0
15	Salaverry	S3MP6	Cheilodactylus variegatus	Peruvian morwong	Pin		34.3	1.66667	8.33333	329.5	-15.0644	13.9122	0	0	0	0	0	0	1.3775	0	0	0	6.75225	0	0	0	4.151	0	0	0	0	0	0	0	0	0	0	0	0	0	0	0	0	0	0	12.2808	0	0	0
21	Salaverry	S3MP12	Cheilodactylus variegatus	Peruvian morwong	Pin		34.3	1.26667	6.33333	250.42	-14.8205	13.6909	0	0	0	0.6885	0	0	1.32925	0	0.59875	0	6.97025	0.91475	0.76225	0	3.579	4.76175	0	0	0	0	0	0	0	0	0	0	0	0	0	0	0	0	0	13.928	5.6765	0	0
30	Máncora	S1MP5	Dosidicus gigas	Jumbo squid	Cal	95		1.63333	8.16667	322.91	-17.2095	11.3632	0	0	0	0	0	0	1.4135	0	0.5085	0	7.282	0	0.75625	0	3.2395	3.45775	0	0	0	0	0	0	0	0	0	0	0	0	0	0	0	0	0	13.1997	3.45775	0	0
33	Máncora	S1MP6	Dosidicus gigas	Jumbo squid	Cal	95					-18.6087	12.2076																																		0	0	0	0
34	Máncora	S1MP7	Dosidicus gigas	Jumbo squid	Cal	95					-16.5213	12.6555																																		0	0	0	0
22	Salaverry	S3MP16	Ophioscion scierus	Point-tuza croaker	Gal		25	1.1	5.5	217.47	-14.5384	14.6544	0	0	0	0	0	0	0.8115	0	0	0	3.6285	0	0	0	1.766	0	0	0	0	0	0	0	0	0	0	0	0	0	0	0	0	0	0	6.206	0	0	0
5	San José	S2MP1X	Symphurus melanurus	Drab tonguefish	Len		15	1.16667	5.83333	230.65	-14.1634	12.642	0	0	0	0	0	0	0	0	0	0	2.42675	0	0	0	1.0855	1.66775	0	0	0	0	0	0	0	0	0	0	0	0	0	0	0	0	0	3.51225	1.66775	0	0
17	Salaverry	S3MP11	Trachinotus paitensis	Paloma pompano	Pam		30	2.9	14.5	573.33	-13.9215	12.6221	0	0	0	0	0	0	3.595	0	0.83275	0	28.6925	8.47725	0	0	9.83875	29.7415	0	0	0	0	0	0	0	0	0	0	0	0	0	0	13.928	0	0	42.959	38.2188	13.928	13.928
14	Salaverry	S3MP14	Anchoa nasus	Longnose anchovy	Sam		8	1.9	9.5	375.63	-16.0521	13.7325	0	0	0	0	0	0	0.88475	0	0	0	3.635	0	0	0	1.52275	0	0	0	0	0	0	0	0	0	0	0	0	0	0	0	0	0	0	6.0425	0	0	0
[truncated: 1 more columns]
